# Supplementary material for: Low-temperature wafer-scale synthesis of two-dimensional SnS2
Source: Royal Society of Chemistry journal article supplement (doi:10.1039/c8nr05450a), 2018-01-01
Supplement: c8nr05450a1.pdf [file c8nr05450a1.pdf]

## Electronic Supplementary Information

### Low-temperature wafer-scale synthesis of two-dimensional SnS<sub>2</sub>

Jung Joon Pyeon,<sup>a,b</sup> In-Hwan Baek,<sup>a,c</sup> Weon Cheol Lim,<sup>d</sup> Keun Hwa Chae,<sup>d</sup> Seong Ho Han,<sup>e</sup> Ga Yeon Lee,<sup>e</sup> Seung-Hyub Baek,<sup>a</sup> Jin-Sang Kim,<sup>a</sup> Ji-Won Choi,<sup>a</sup> Taek-Mo Chung,<sup>e</sup> Jeong Hwan Han,<sup>f</sup> Chong-Yun Kang,<sup>a,b</sup> Seong Keun Kim<sup>\*a</sup>

<sup>a</sup> Center for Electronic Materials, Korea Institute of Science and Technology, Seoul 02792, Korea

<sup>b</sup> KU-KIST Graduate School of Converging Science and Technology, Korea University, Seoul 02841, Korea

<sup>c</sup> Department of Materials Science and Engineering, and Inter-University Semiconductor Research Center, Seoul National University, Seoul 08826, Korea

<sup>d</sup> Advanced Analysis Center, Korea Institute of Science and Technology, Seoul 02792, Korea

<sup>e</sup> Division of Advanced Materials, Korea Research Institute of Chemical Technology, Daejeon 34114, Korea

<sup>f</sup> Department of Materials Science and Engineering, Seoul National University of Science and Technology, Seoul 01811, Korea

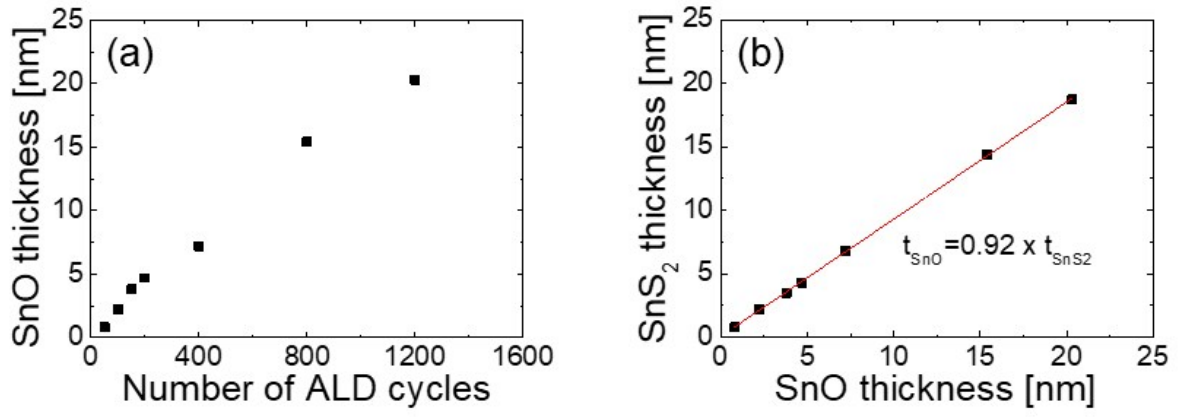

**Fig. S1** (a) Variation in the SnO thickness as a function of number of ALD cycles and (b) Variation in the SnS<sub>2</sub> thickness as a function of the SnO thickness.

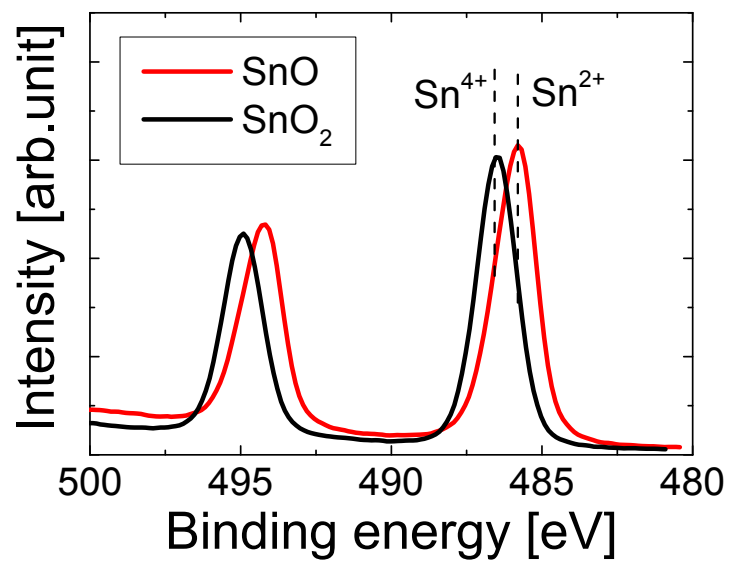

**Fig. S2** XPS spectra of Sn 3d core level in the SnO and SnO<sub>2</sub> thin films grown by ALD.

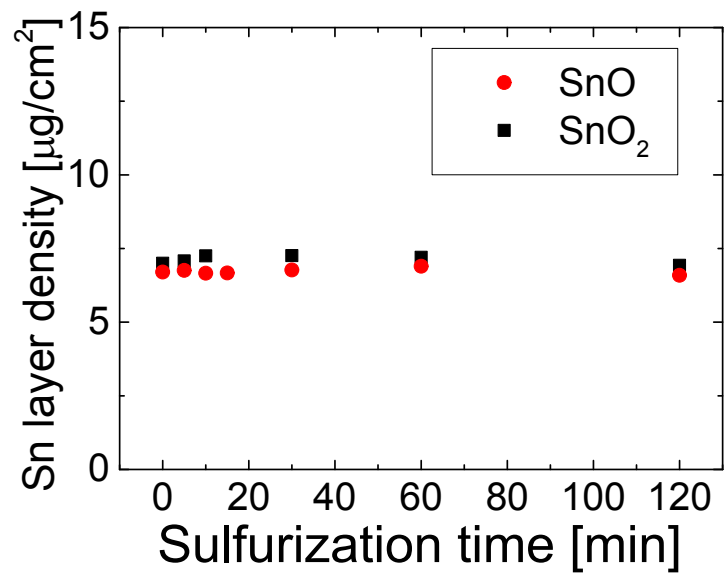

**Fig. S3** Variation in the Sn layer density of the SnO and SnO<sub>2</sub> sulfurized at 350 °C as a function of the sulfurization time. The Sn layer density was measured using WDXRF.

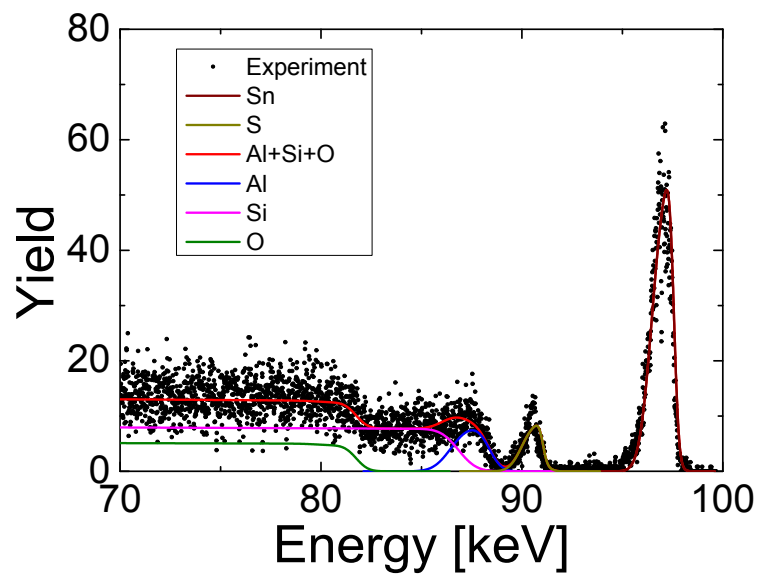

**Fig. S4** MEIS spectrum for the 3 nm-thick SnO grown on Al<sub>2</sub>O<sub>3</sub>/SiO<sub>2</sub>/Si sulfurized at 350 °C for 60 min.

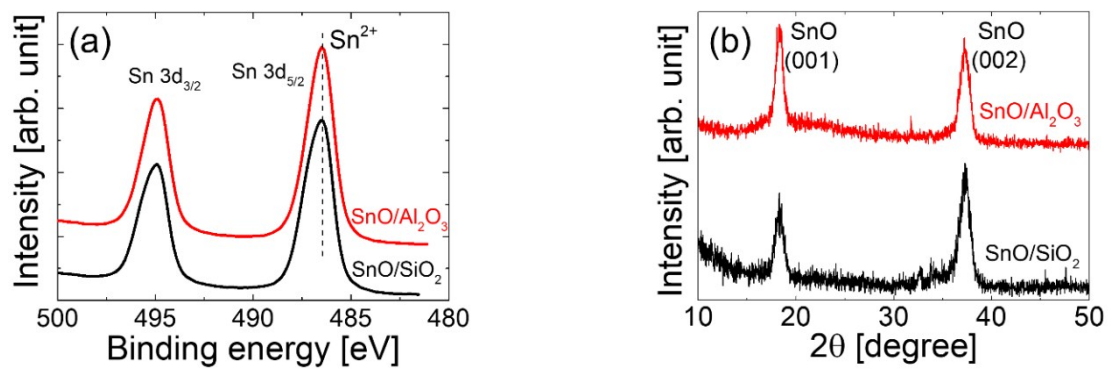

**Fig. S5** (a) Sn 3d XPS spectra and (b)  $\theta$ -2 $\theta$  XRD patterns of the ALD-grown SnO on amorphous Al<sub>2</sub>O<sub>3</sub> and SiO<sub>2</sub>.

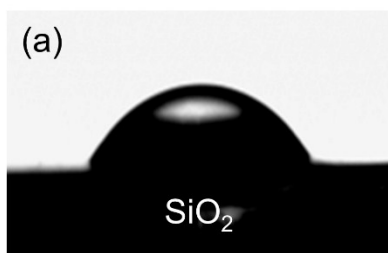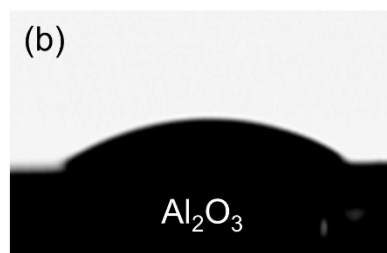

**Fig. S6** Optical images of water droplet on (a) amorphous  $\text{SiO}_2$  and (b)  $\text{Al}_2\text{O}_3$ .
